# Supplementary material
Source: PubMed Central journal article supplement (PMC8553551)
Supplement: jci-131-146408-s191.pdf [file jci-131-146408-s191.pdf]

## Supplementary Figure Legends

**Figure S1.** (A) Viral load Ct value versus days after the estimated virus exposure for each patient. The viral clearance rate is defined as the slope, and patients were separated into fast and slow clearance groups.

(B) tSNE maps of abundances of NK cells with indicated characteristics for each patient. The maps are color coded by cell density (yellow is high, and purple is low). The numbers indicate the cluster IDs of each FlowSOM metacluster.

**Figure S2.** tSNE visualizations of median arcsinh-transformed intensities of markers in the CyTOF panel in each FlowSOM cluster. Red is high. Blue is low.

**Figure S3.** (A) The correlations between cell frequencies and the viral clearance in FlowSOM metaclusters that are not shown in Figure 1F.

(B) Representative biaxial contour plots of NKp46 and NKp30 from samples from patients in fast and slow clearance groups. The numbers indicate the percentage of cells in each quadrant.

(C) Boxplots of the frequencies of NKp30<sup>+</sup> NKp46<sup>+</sup> cells in patients from slow (n=10) and fast (n=11) groups in two independent experiments. Maximums, 75<sup>th</sup>, 50<sup>th</sup>, 25<sup>th</sup> percentiles, and minimums are 47.70, 39.05, 31.70, 15.90, and 14.00 for the slow group and 64.60, 51.30, 41.80, 28.80, and 12.50 for the fast group. *P*-value=0.0461 based on one-tailed unpaired Student's *t* test.

(D) Biaxial contour plots of DNAM1 and TIGIT from patients and healthy donors.

(E) Histogram overlays of percentage of the maximum events for DNAM1 and TIGIT in NK cells from two healthy donors vs. CyTOF intensity (left) and fluorescence intensity (right).

**Figure S4.** (A) Heatmap of pair-wise Pearson's correlation coefficients used to identify correlated markers in co-culture experiments. Positive correlations are displayed on a red scale, and negative correlations are displayed on a blue scale.

(B) Spearman correlations of pseudo-time point data (layers 1 to 10) based on TICONET vs. experimental data (Day 0 to Day 11) for the combined data for all three cell types (upper left), ectoderm (upper right), endoderm (lower left), and mesoderm (lower right).

(C) Heatmap of arcsinh-transformed marker intensities of protein expression (horizontal dimension) from the 0-hour time point NK cells in clusters C1 to C12 (vertical dimension).

(D) Line graphs of arcsinh-transformed intensities of the indicated markers from NK cells in each TICONET cluster. The cytolytic-skewed clusters are indicated by the green rectangle. The y-axis data are scaled marker intensities, and x-axis data are levels in each TICONET cluster.

(E) Boxplots of arcsinh-transformed intensities of 30 features obtained from TNF $\alpha$ -skewed (purple) and cytolytic-skewed (green) NK cells. Markers were sorted according to the adjusted *P* by Mann-Whitney U test after Bonferroni correction.

**Figure S5.** (A) Dot plots of the differential expression of ligands induced after pseudovirus infection of A549 cells (gray) and Calu-1 cells (black) in two independent experiments. Differential expression was calculated by subtracting the arcsinh-transformed intensity of ligands in cells that do not express the viral spike protein from that in the cells that do express the spike protein. Data represent mean  $\pm$  SEM.

(B) Representative immunofluorescence images of a lung tissue section from a SARS-CoV-2-infected patient stained for nectin-4 (red) and N protein (green). Cell nuclei were visualized with DAPI (white).

(C) The hierarchical manual gating strategy for different cell types in PBMCs samples.

(D) Histogram overlay of DNAM1 and TIGIT expression on NK cells with or without IL-2 treatment overnight. Gray line represents the fluorescence-minus-one (FMO) control; black line and orange line are data without and with IL-2 treatment, respectively.

(E) Histogram overlay of expression of IL-2 receptor subunits, CD25, CD122, and CD132 on NK cells with high or low DNAM1 expression. Gray line represents the FMO control; dark blue line and light blue are data for NK cells that express high and low levels of DNAM1, respectively.

(F) The heatmap of arcsinh-transformed protein expression of the NK receptor on the NK cells expanded with K562-41BBL-mbIL-15 on Day 0 and Day 7.

**Figure S1: Related to Figure 1.**

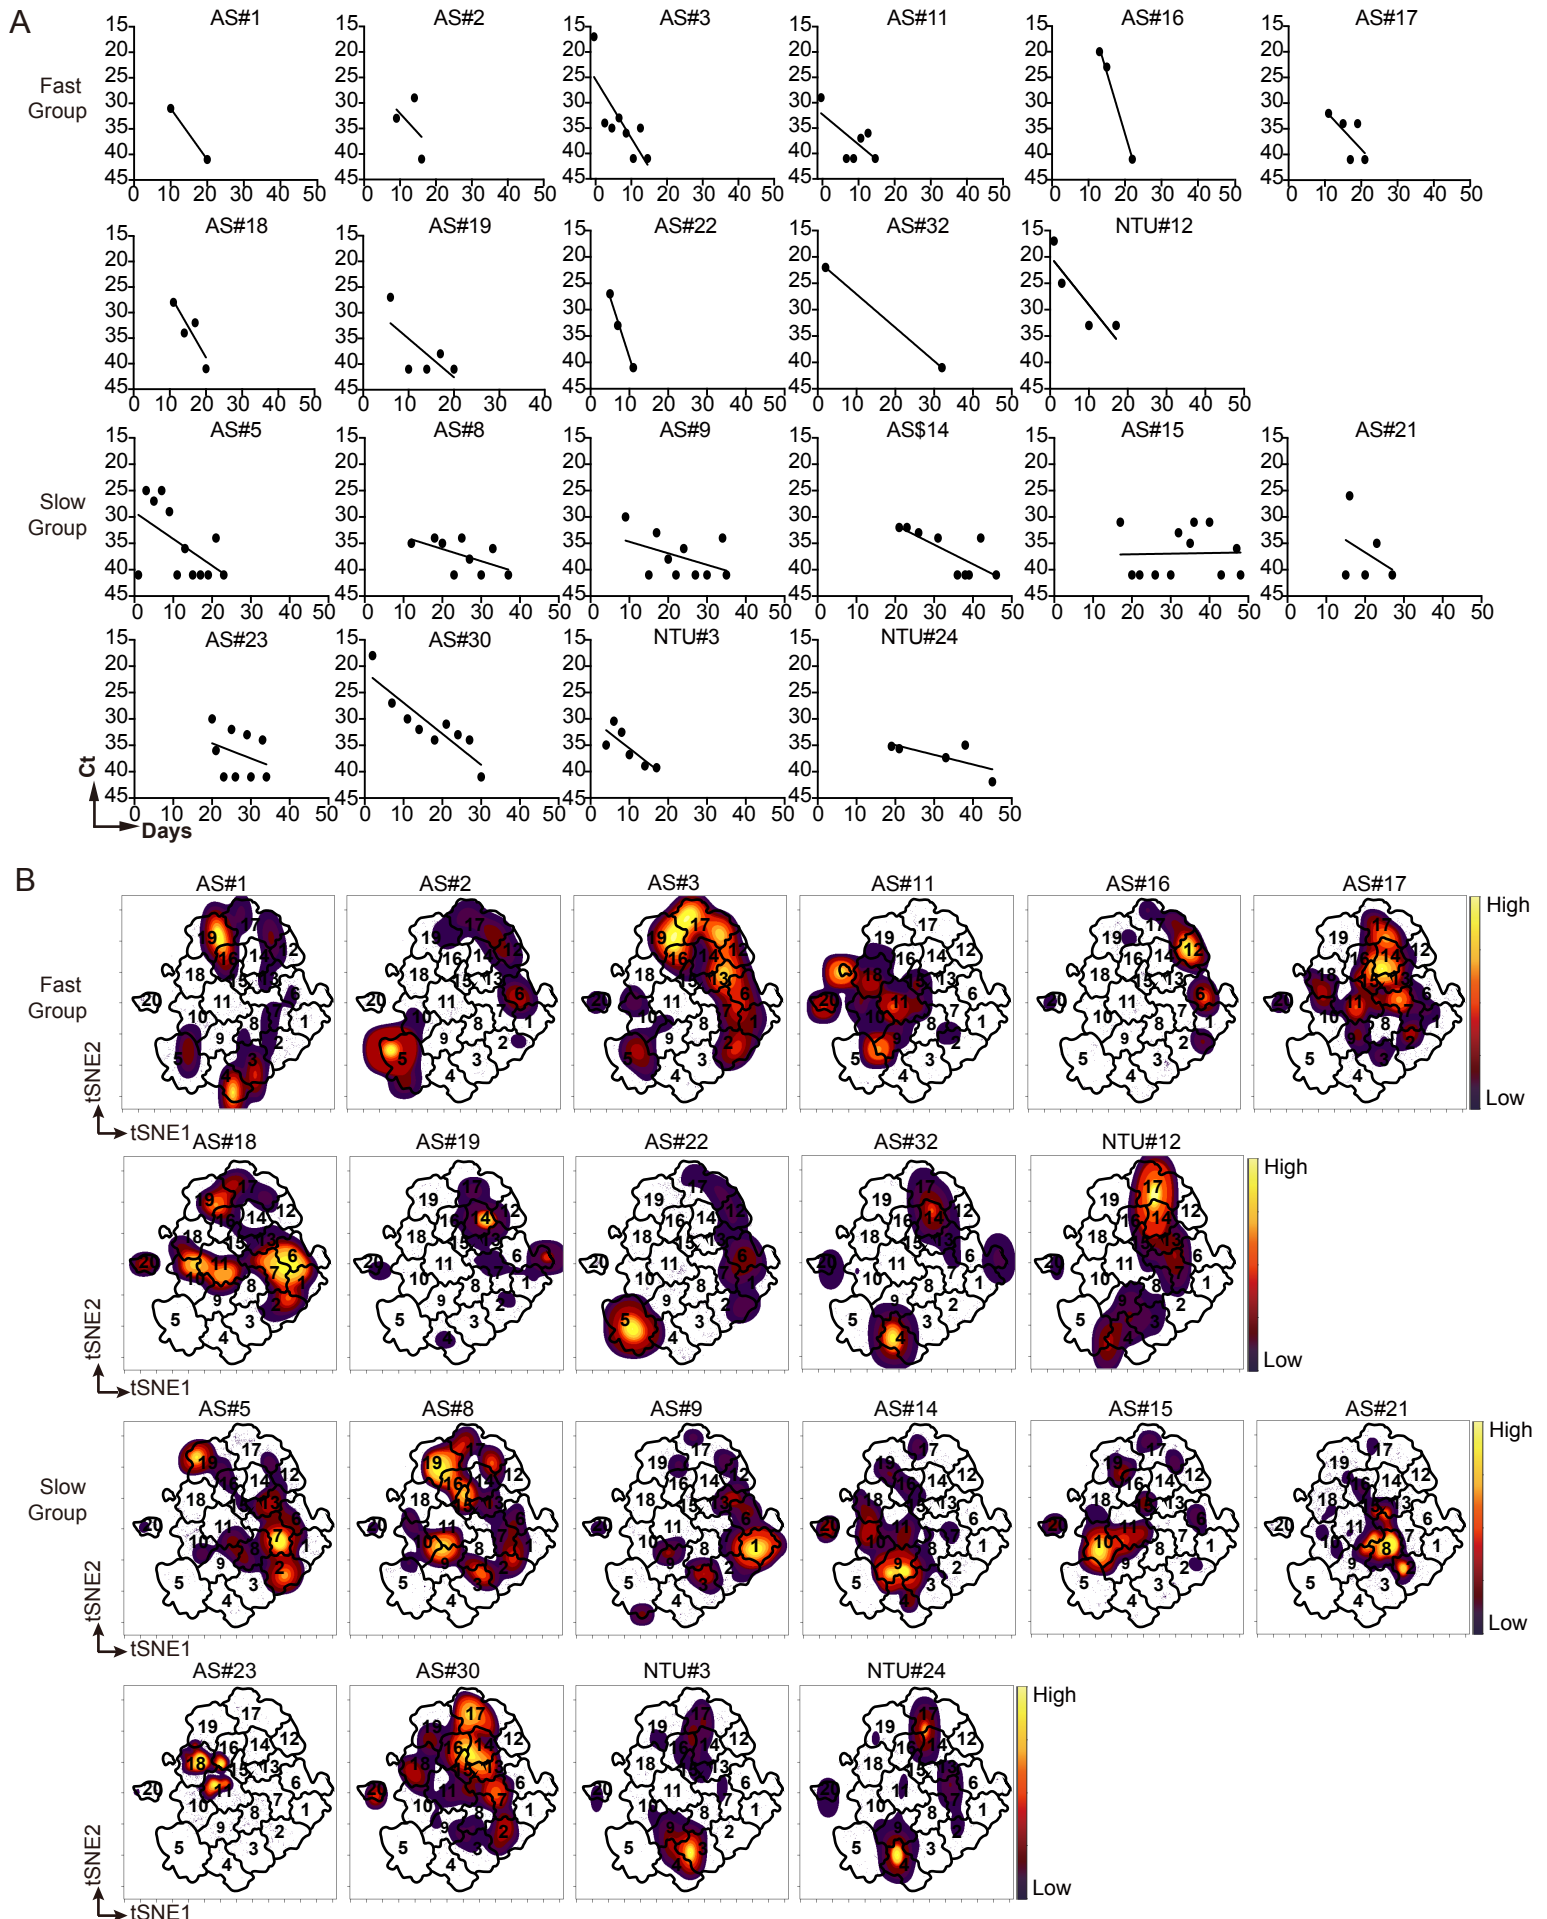

Figure S1. (A) Viral load Ct value versus days after the estimated virus exposure for each patient. The viral clearance rate is defined as the slope, and patients were separated into fast and slow clearance groups. (B) tSNE maps of abundances of NK cells with indicated characteristics for each patient. The maps are color coded by cell density (yellow is high and purple is low). The numbers indicate the cluster IDs of each FlowSOM metacluster.

Figure S2: Related to Figure 1.

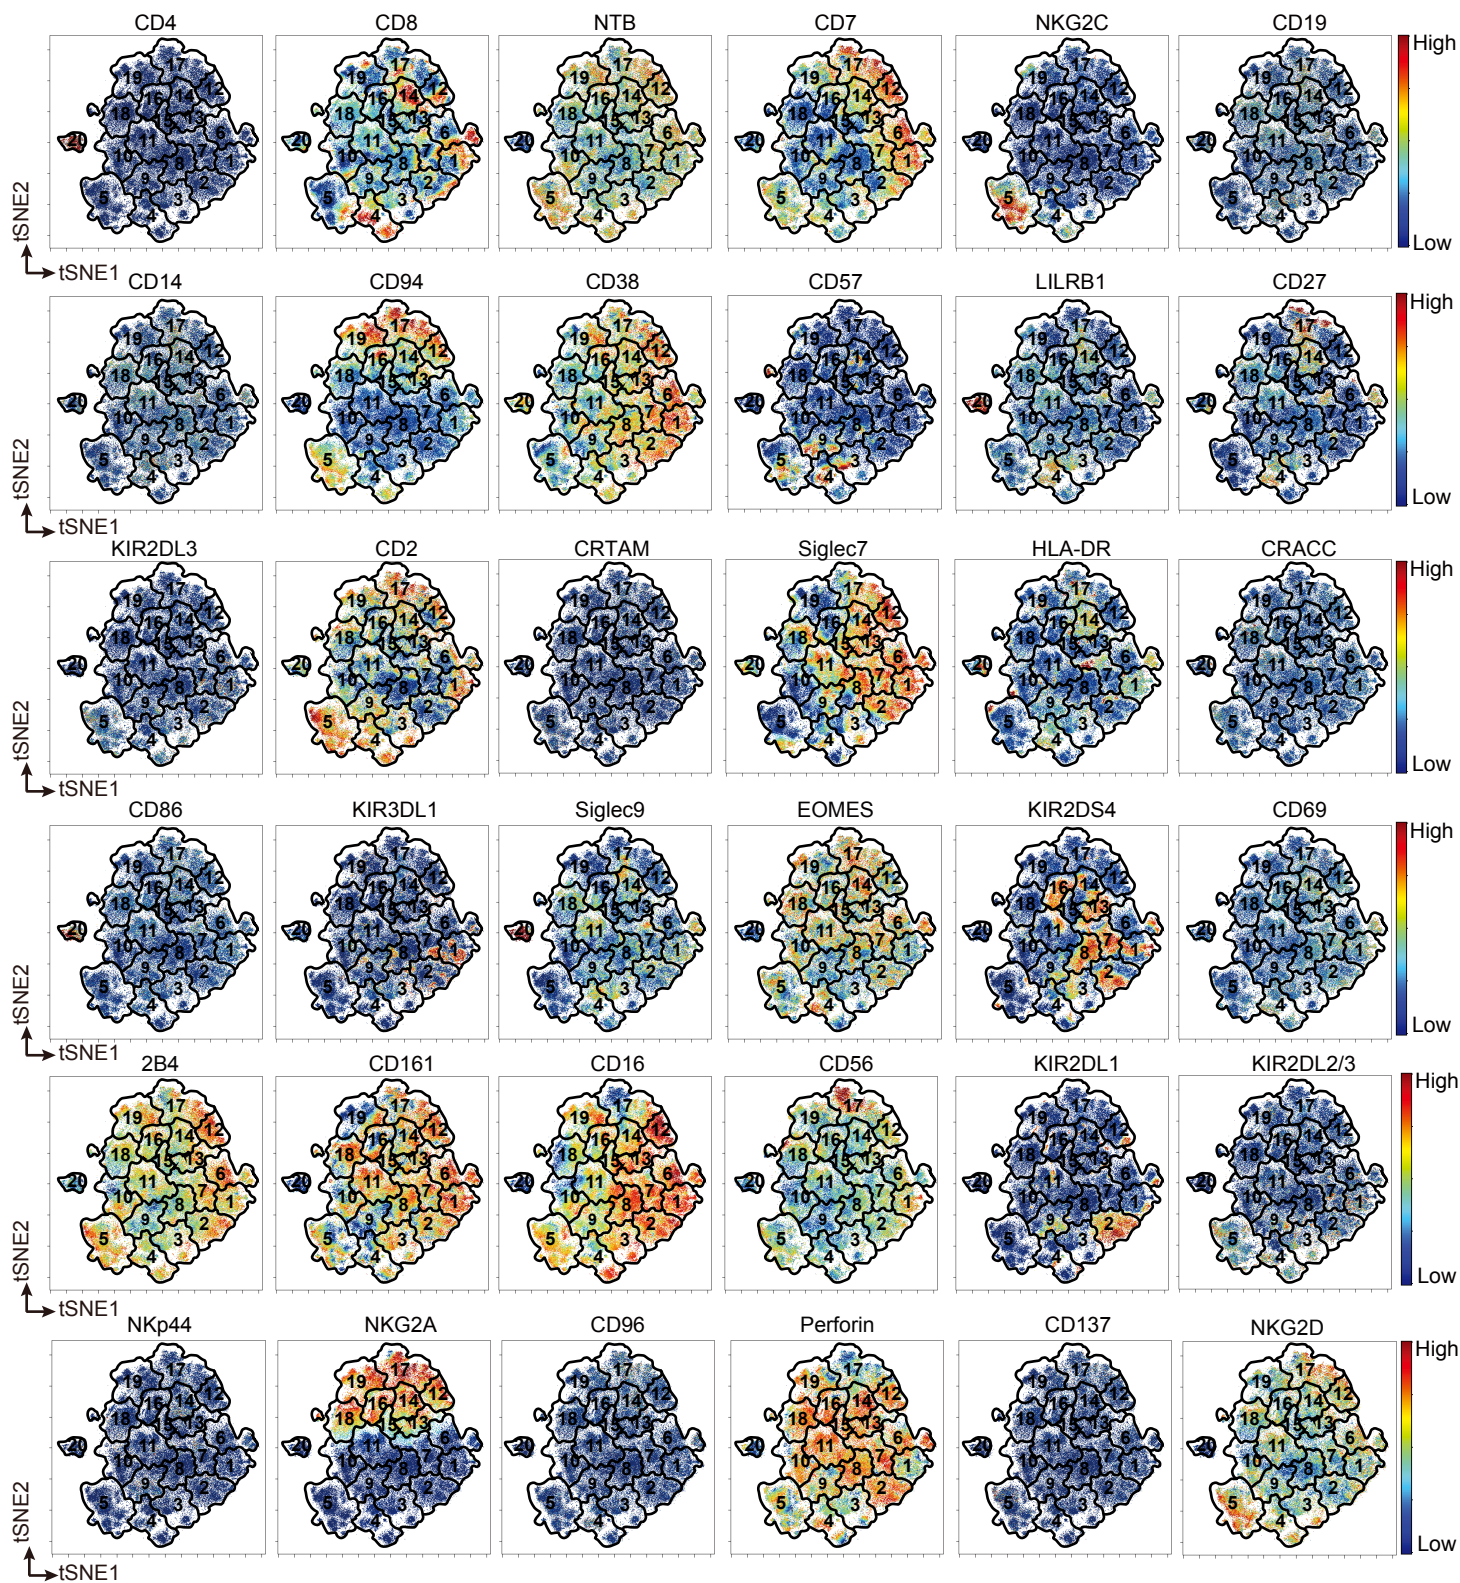

Figure S2. tSNE visualizations of median arcsinh-transformed intensities of markers in the CyTOF panel in each FlowSOM cluster. Red is high. Blue is low.



**Figure S3: Related to Figure 1.**

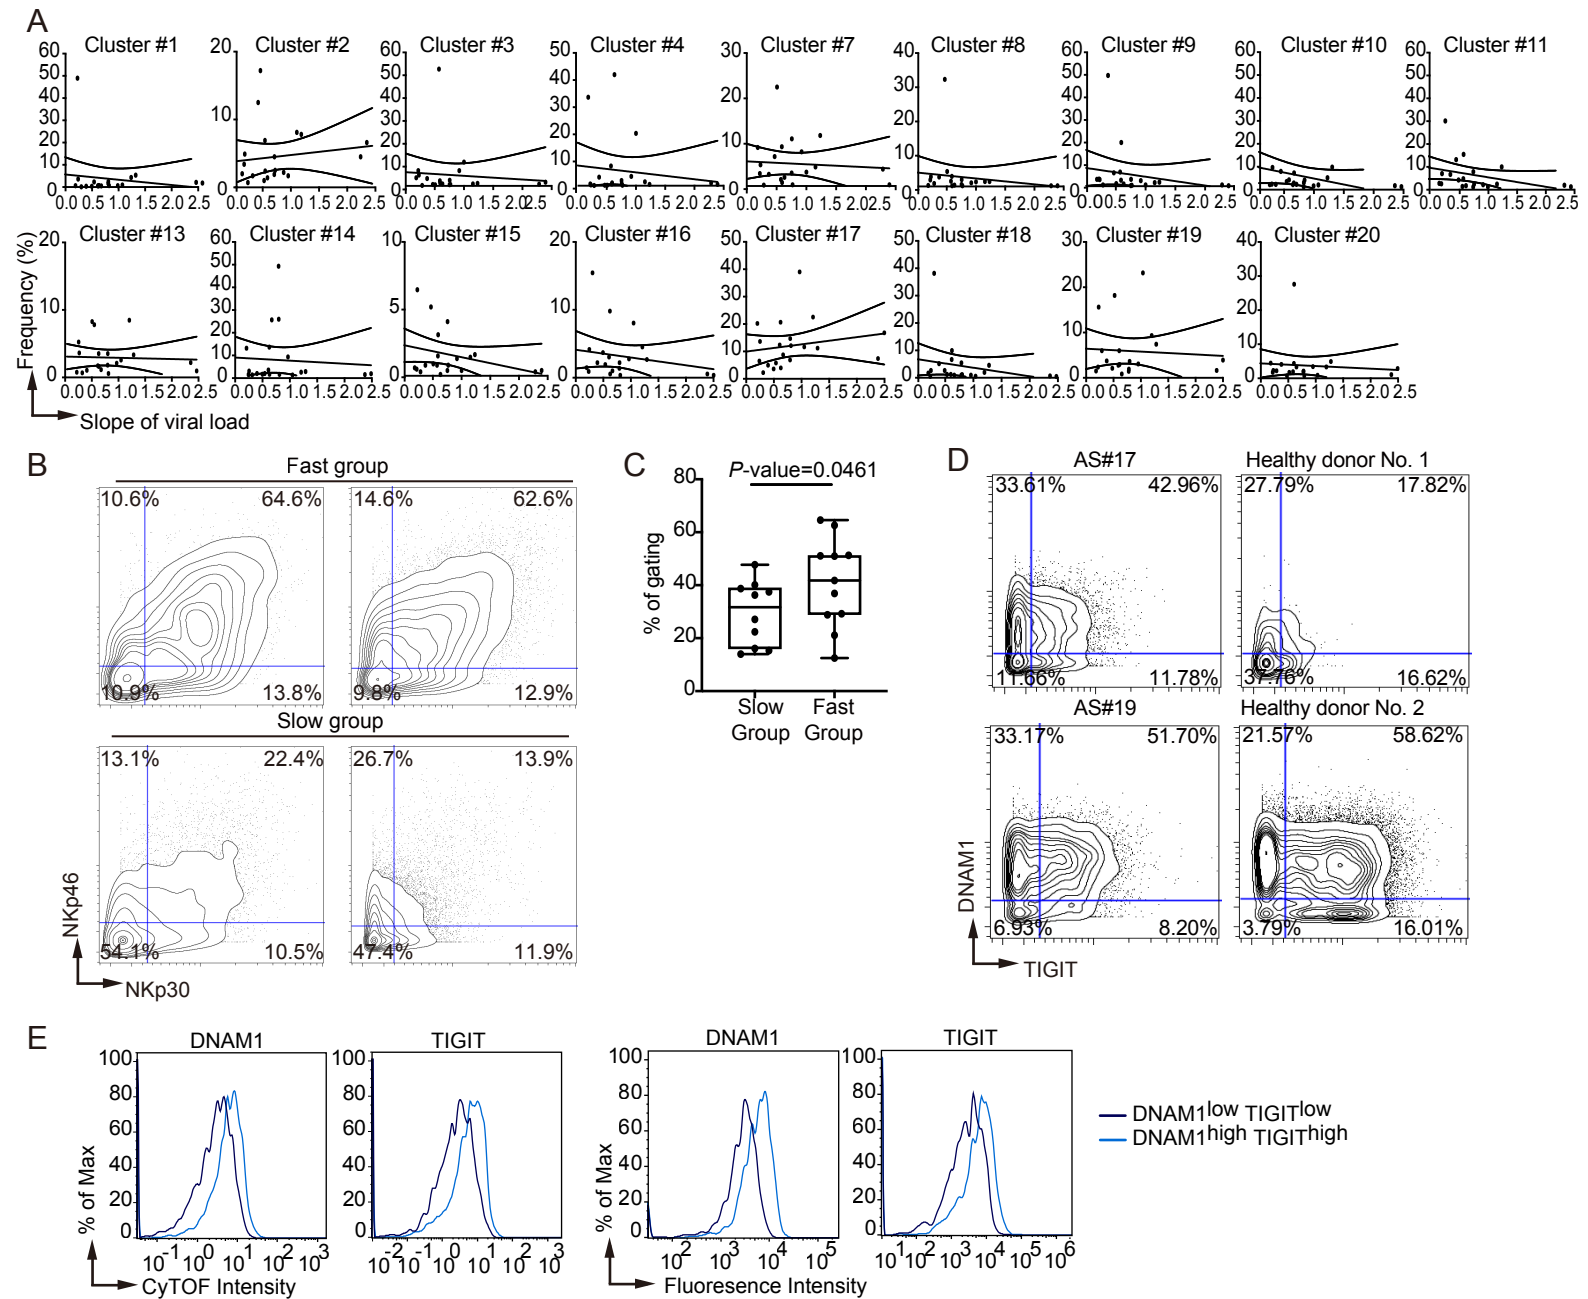

Figure S3. (A) The correlations between cell frequencies and the viral clearance in FlowSOM metaclusters that are not shown in Figure 1F. (B) Representative biaxial contour plots of NKp46 and NKp30 from samples from patients in fast and slow clearance groups. The number indicates the percentage of cells in each quadrant. (C) Boxplots of the frequencies of NKp30<sup>+</sup> NKp46<sup>+</sup> cells in patients from slow (n=10) and fast (n=11) groups in two independent experiments. Maximums, 75<sup>th</sup>, 50<sup>th</sup>, 25<sup>th</sup> percentiles, and minimums are 47.70, 39.05, 31.70, 15.90, and 14.00 for the slow group and 64.60, 51.30, 41.80, 28.80, and 12.50 for the fast group.  $P$ -value=0.0461 based on one-tailed unpaired Student's  $t$  test. (D) Biaxial contour plots of DNAM1 and TIGIT from patients and healthy donors. (E) Histogram overlays of percentage of the maximum events for DNAM1 and TIGIT in NK cells from two healthy donors vs. CyTOF intensity (left) and fluorescence intensity (right).

**Figure S4: Related to Figure 2.**

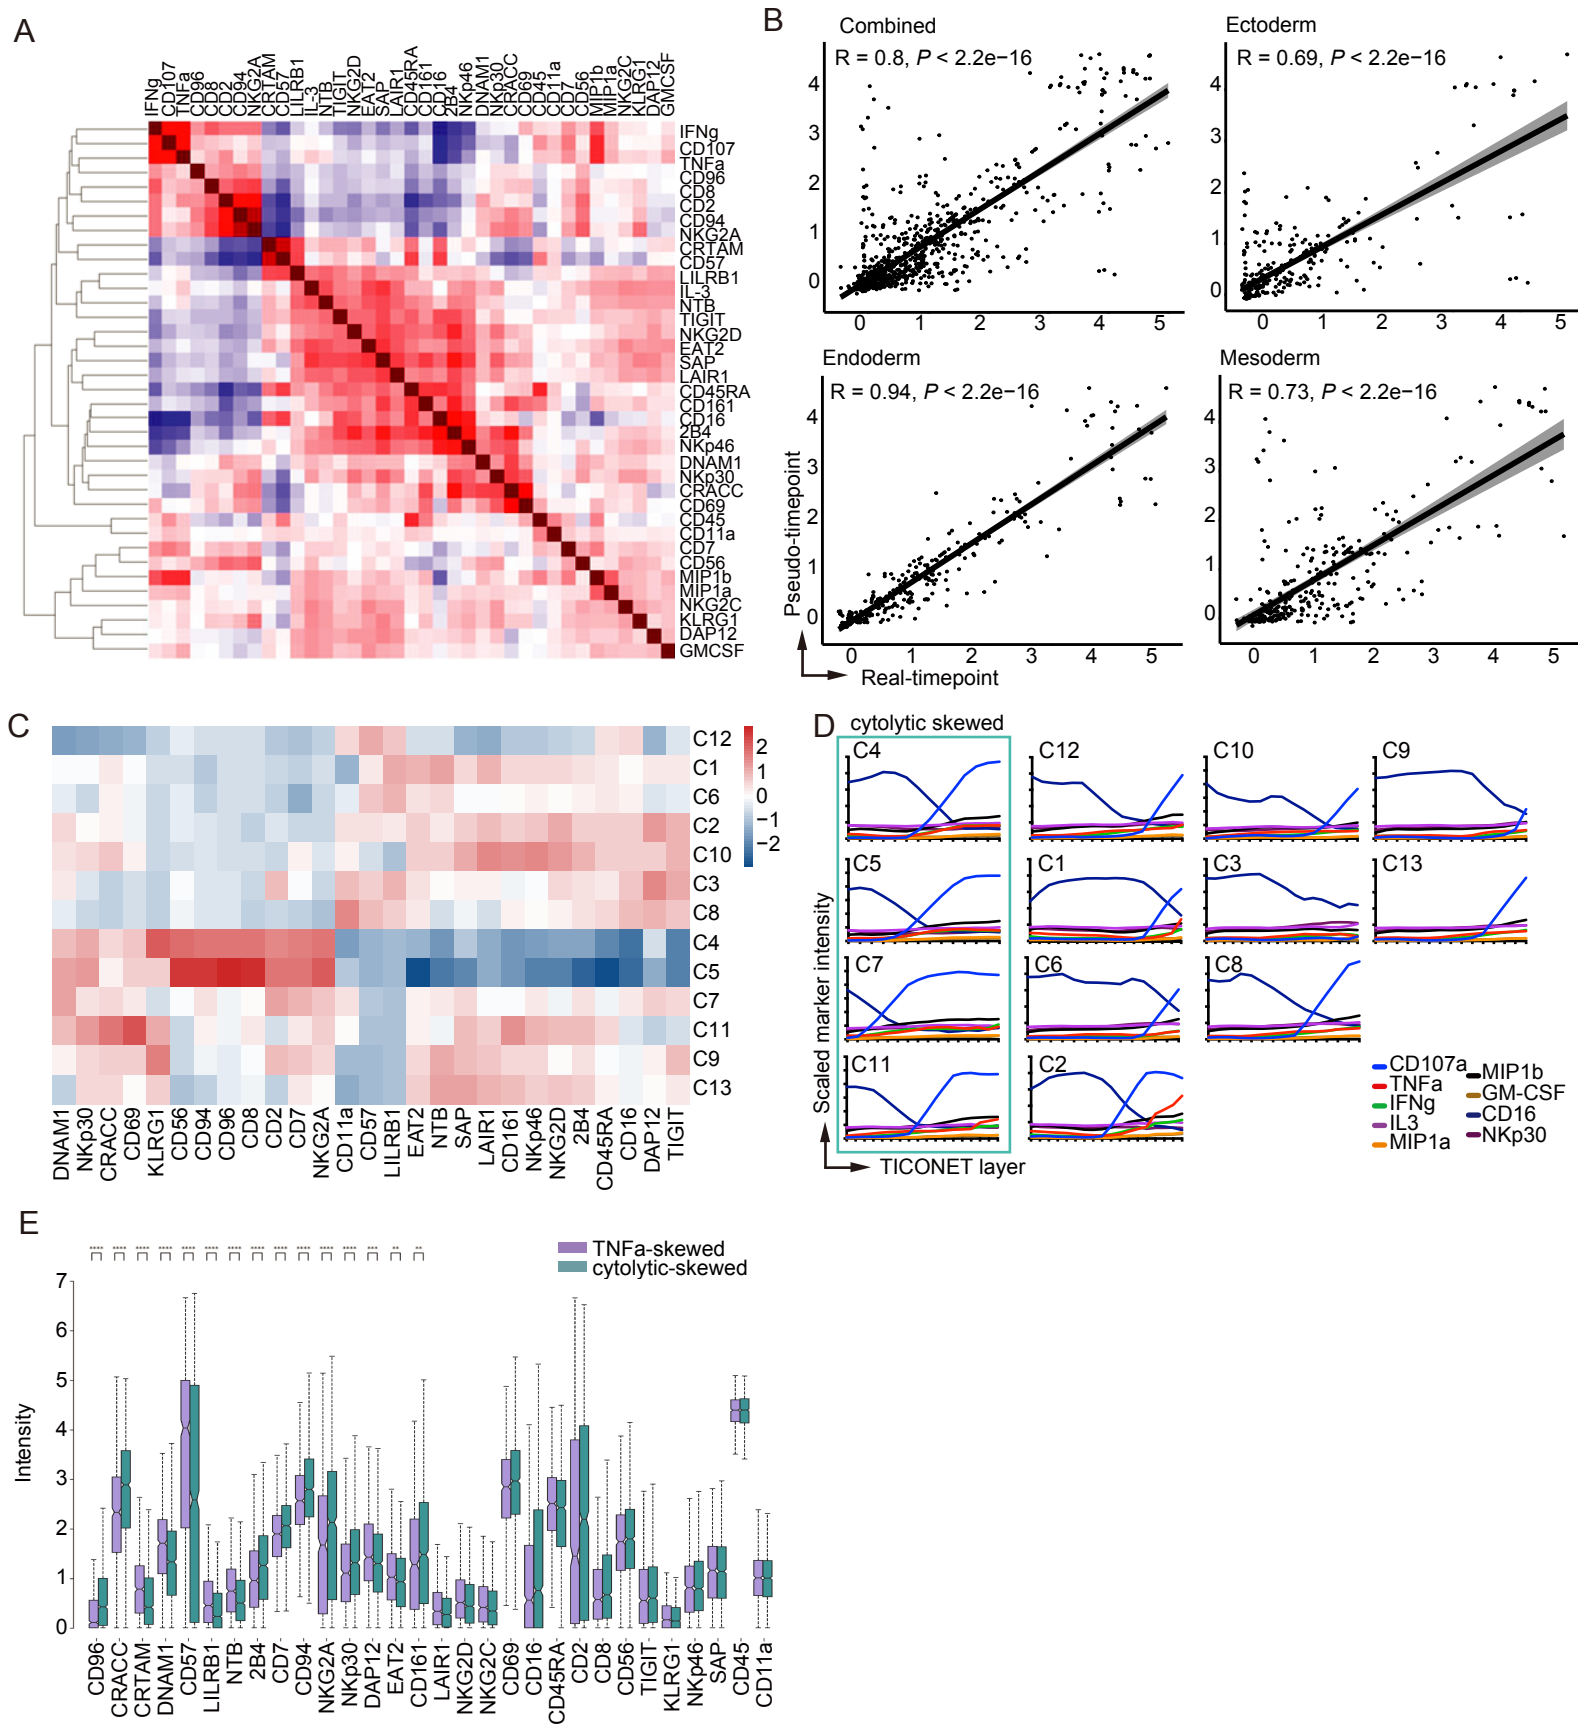

Figure S4. (A) Heatmap of pair-wise Pearson's correlation coefficients used to identify correlated markers in co-culture experiments. Positive correlations are displayed on a red scale, and negative correlations are displayed on a blue scale. (B) Spearman correlations of pseudo-time point data (layers 1 to 10) based on TICONET vs. experimental data (Day 0 to Day 11) for the combined data for all three cell types (upper left), ectoderm (upper right), endoderm (lower left), and mesoderm (lower right). (C) Heatmap of arcsinh-transformed marker intensities of protein expression (horizontal dimension) from the 0-hour time point NK cells in clusters C1 to C12 (vertical dimension). (D) Line graphs of arcsinh-transformed intensities of the indicated markers from NK cells in each TICONET cluster. The cytolytic-skewed clusters are indicated by the green rectangle. The y-axis data are scaled marker intensities, and x-axis data are levels in each TICONET cluster. (E) Boxplots of arcsinh-transformed intensities of 30 features obtained from TNFa-skewed (purple) and cytolytic-skewed (green) NK cells. Markers were sorted according to the adjusted P by Mann-Whitney U test after Bonferroni correction.

**Figure S5: Related to Figure 3.**

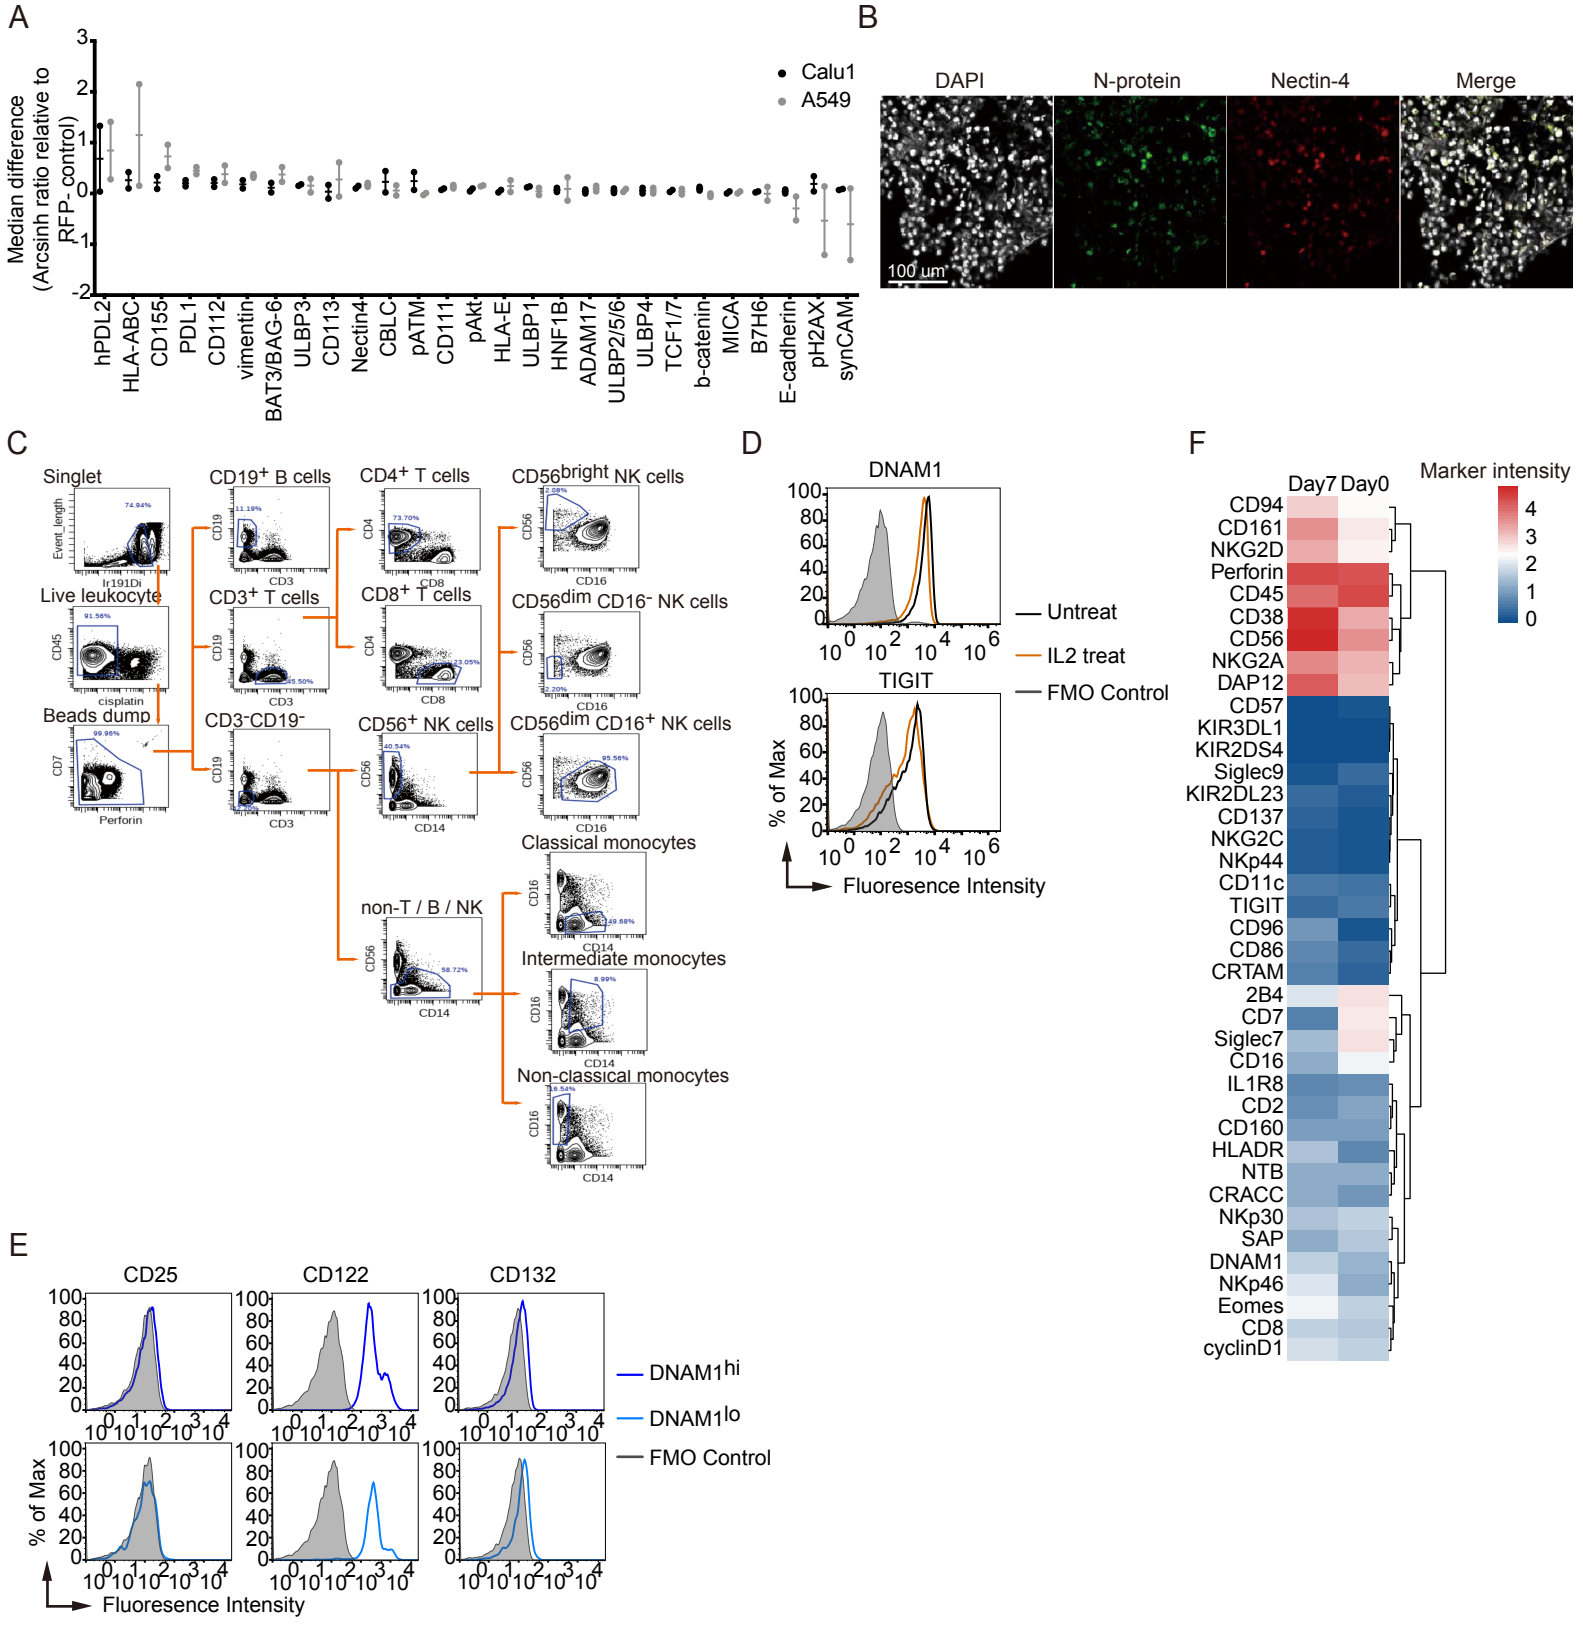

Figure S5. (A) Dot plots of the differential expression of ligands induced after pseudovirus infection of A549 cells (gray) and Calu-1 cells (black) in two independent experiments. Differential expression was calculated by subtracting the arcsinh-transformed intensity of ligands in cells that do not express the viral spike protein from that in the cells that do express the spike protein. Data represent mean  $\pm$  SEM. (B) Representative immunofluorescence images of a lung tissue section from a SARS-CoV-2-infected patient stained for nectin-4 (red) and N protein (green). Cell nuclei were visualized with DAPI (white). (C) The hierarchical manual gating strategy for different cell types in PBMCs samples. (D) Histogram overlay of DNAM1 and TIGIT expression on NK cells with or without IL-2 treatment overnight. Gray line represents the fluorescence-minus-one (FMO) control; black line and orange line are data without and with IL-2 treatment, respectively. (E) Histogram overlay of expression of IL-2 receptor subunits, CD25, CD122, and CD132 on NK cells with high or low DNAM1 expression. Gray line represents the FMO control; dark blue line and light blue are data for NK cells that express high and low levels of DNAM1, respectively. (F) The heatmap of arcsinh-transformed protein expression of the NK receptor on the NK cells expanded with K562-41BBL-mbIL-15 on Day 0 and Day 7.

**Table S1 The gender, age, and KIR and HLA genotypes of patients. Boxes indicate positive expression from the genotyping.**

| Subject ID | CENTROMERIC |      |      |      |       |        |      |      |      |      | TELOMERIC |      |       |      |      |      |      | KIR Ligand |       |         |       |       |
|------------|-------------|------|------|------|-------|--------|------|------|------|------|-----------|------|-------|------|------|------|------|------------|-------|---------|-------|-------|
|            | 3DL3        | 2DS2 | 2DL2 | 2DL3 | 2DL5B | 2DS3/5 | 2DP1 | 2DL1 | 3DP1 | 2DL4 | 3DL1      | 3DS1 | 2DL5A | 2DS3 | 2DS5 | 2DS1 | 2DS4 | 3DL2       | HLA-A | HLA-B   | HLA-C |       |
| AS1        | █           | ---  | ---  | █    | ---   | ---    | █    | █    | █    | █    | █         | ---  | ---   | ---  | ---  | ---  | █    | █          | BW4   | BW6     | C1/C1 |       |
| AS2        | █           | ---  | ---  | █    | ---   | ---    | █    | █    | █    | █    | █         | ---  | ---   | ---  | ---  | ---  | █    | █          | BW4   | BW4/BW6 | C1/C1 |       |
| AS3        | █           | ---  | ---  | █    | ---   | ---    | █    | █    | █    | █    | █         | ---  | ---   | ---  | ---  | ---  | █    | █          | ---   | BW6     | C1/C1 |       |
| AS5        | █           | ---  | ---  | █    | ---   | ---    | █    | █    | █    | █    | █         | ---  | ---   | ---  | ---  | ---  | █    | █          | ---   | BW4     | C1/C1 |       |
| AS8        | █           | ---  | ---  | █    | ---   | 2DS3   | █    | █    | █    | █    | █         | █    | █     | █    | █    | █    | █    | █          | BW4   | BW6     | C1/C1 |       |
| AS9        | █           | █    | █    | █    | █     | 2DS3   | █    | █    | █    | █    | █         | ---  | ---   | █    | ---  | ---  | █    | █          | ---   | BW6     | C1/C1 |       |
| AS15       | █           | ---  | ---  | █    | ---   | ---    | █    | █    | █    | ---  | █         | ---  | ---   | ---  | ---  | ---  | █    | █          | ---   | BW4     | C1/C1 |       |
| AS16       | █           | █    | █    | █    | █     | 2DS3   | █    | █    | █    | █    | █         | ---  | ---   | █    | ---  | ---  | █    | █          | ---   | BW4     | C1/C1 |       |
| AS18       | █           | ---  | ---  | █    | ---   | ---    | █    | █    | █    | █    | █         | ---  | ---   | ---  | ---  | ---  | █    | █          | ---   | BW4/BW6 | C1/C2 |       |
| AS21       | █           | ---  | ---  | █    | ---   | ---    | █    | █    | █    | █    | █         | ---  | ---   | ---  | ---  | ---  | █    | █          | ---   | BW4     | C1/C1 |       |
| AS22       | █           | ---  | ---  | █    | ---   | 2DS5   | █    | █    | █    | █    | █         | █    | █     | █    | █    | █    | █    | █          | ---   | BW4     | C1/C1 |       |
| AS23       | █           | ---  | ---  | █    | ---   | ---    | █    | █    | █    | █    | █         | ---  | ---   | ---  | ---  | ---  | █    | █          | ---   | BW4     | C1/C1 |       |
| NTU3       | █           | ---  | ---  | █    | ---   | 2DS3   | █    | █    | █    | █    | █         | █    | █     | █    | █    | █    | █    | █          | ---   | BW4/BW6 | C2/C2 |       |
| NTU12      | █           | ---  | ---  | █    | ---   | ---    | █    | █    | █    | █    | █         | ---  | ---   | ---  | ---  | ---  | █    | █          | ---   | BW4/BW6 | C1/C1 |       |
| NTU24      | █           | ---  | ---  | █    | ---   | 2DS3   | █    | █    | █    | ---  | ---       | █    | █     | █    | ---  | █    | █    | █          | ---   | BW4     | BW4   | C1/C1 |
| AS11       | █           | ---  | ---  | █    | ---   | 2DS3   | █    | █    | █    | ---  | ---       | █    | █     | █    | ---  | █    | █    | ---        | BW4   | BW6     | C1/C1 |       |
| AS14       | █           | ---  | ---  | █    | ---   | ---    | █    | █    | █    | █    | █         | ---  | ---   | ---  | ---  | ---  | █    | ---        | BW4   | BW4     | C1/C1 |       |
| AS17       | █           | ---  | ---  | █    | ---   | ---    | █    | █    | █    | █    | █         | ---  | ---   | ---  | ---  | ---  | █    | █          | ---   | BW4/BW6 | C1/C1 |       |
| AS19       | █           | ---  | ---  | █    | ---   | ---    | █    | █    | █    | █    | █         | ---  | ---   | ---  | ---  | ---  | █    | █          | BW4   | BW6     | C1/C1 |       |
| AS30       | █           | ---  | ---  | █    | ---   | ---    | █    | █    | █    | █    | █         | ---  | ---   | ---  | ---  | ---  | █    | █          | BW4   | BW4/BW6 | C1/C1 |       |
| AS32       | █           | ---  | ---  | █    | ---   | ---    | █    | █    | █    | █    | █         | ---  | ---   | ---  | ---  | ---  | █    | █          | ---   | BW4/BW6 | C1/C1 |       |

Framework gene  
 Group A KIR gene  
 Group B KIR gene



**Table S2 Mass cytometry panel used for evaluation of COVID-19 patient peripheral blood.**

| <b>Antigen</b>      | <b>Clone</b> | <b>Metal label</b> | <b>Mass</b> | <b>Source</b> | <b>Catalog No.</b> |
|---------------------|--------------|--------------------|-------------|---------------|--------------------|
| CD45                | HI30         | Y                  | 89          | BioLegend     | 304002             |
| CD3                 | UCHT1        | In                 | 113         | BioXCell      | BE0231             |
| HLA-DR              | L243         | La                 | 139         | BioXCell      | BE0306             |
| CD7                 | CD7-6B7      | Ce                 | 140         | BioLegend     | 343102             |
| NKG2C               | 134591       | Pr                 | 141         | R&D Systems   | MAB138-100         |
| CD19                | HIB19        | Nd                 | 142         | BioLegend     | 302202             |
| CD14                | M5E2         | Nd                 | 143         | BioLegend     | 301843             |
| CD94                | DX22         | Nd                 | 144         | BioLegend     | 305502             |
| CD38                | HIT2         | Nd                 | 145         | BioLegend     | 303535             |
| CD8                 | SK1          | Nd                 | 146         | BioLegend     | 344727             |
| LILRB1              | 292319       | Sm                 | 147         | NOVUS         | MAB20172           |
| CD27                | L128         | Nd                 | 148         | BD            | Custom             |
| DNAM1               | 11A8         | Sm                 | 149         | BioLegend     | 338302             |
| KIR2DL3             | 180701       | Nd                 | 150         | R&D Systems   | MAB2014-SP         |
| CD2                 | TS1/8        | Eu                 | 151         | Fluidigm      | 3151003B           |
| CRTAM               | 210213       | Sm                 | 152         | R&D Systems   | MAB16951-SP        |
| Siglec7             | 6-434        | Eu                 | 153         | BioLegend     | 339202             |
| NTB                 | NT-7         | Sm                 | 154         | BioLegend     | 317202             |
| CRACC               | 162.1        | Gd                 | 155         | BioLegend     | 331802             |
| CD86                | IT2.2        | Gd                 | 156         | Fluidigm      | 3156035D           |
| KIR3DL1             | DX9          | Gd                 | 157         | BD            | 555964             |
| Siglec9             | K8           | Gd                 | 158         | BioLegend     | 351502             |
| EOMES               | WD1928       | Tb                 | 159         | eBioscience   | 14-4877-82         |
| NKp46               | 195314       | Gd                 | 160         | R&D Systems   | MAB1850-100        |
| KIR2DS4             | 179315       | Dy                 | 161         | R&D Systems   | MAB1847-SP         |
| CD69                | FN50         | Dy                 | 162         | BioLegend     | 310902             |
| 2B4                 | C1.7         | Dy                 | 163         | BioLegend     | 329502             |
| CD161               | HP-3G10      | Dy                 | 164         | BioLegend     | 339919             |
| CD16                | 3G8          | Ho                 | 165         | BioLegend     | 302051             |
| NKG2D               | ON72         | Er                 | 166         | Fluidigm      | 3166016B           |
| KIR2DL1             | 143211       | Er                 | 167         | R&D Systems   | MAB1844-SP         |
| KIR2DL2/3           | GL183        | Er                 | 168         | Beckman       | IM1846             |
| NKp44               | P44-8        | Tm                 | 169         | BioLegend     | 325102             |
| NKG2A               | Z199         | Er                 | 170         | Beckman       | IM2750             |
| CD96                | NK92.39      | Yb                 | 171         | BioLegend     | 338402             |
| NKp30               | 210845       | Yb                 | 172         | R&D Systems   | MAB1849-SP         |
| CD137               | 4B4-1        | Yb                 | 173         | Fluidigm      | 3173015B           |
| TIGIT               | MBSA43       | Yb                 | 174         | eBioscience   | 16-9500-82         |
| Perforin            | B-D48        | Lu                 | 175         | Fluidigm      | 3175004B           |
| CD56                | NCAM16.2     | Yb                 | 176         | BD            | BDB559043          |
| CD57                | HNK1         | Bi                 | 209         | BioLegend     | 359602             |
| DNA                 |              | Ir                 | 191/193     | Fluidigm      | 201192A            |
| Cisplatin Viability |              | Pt                 | 195         | Sigma-Aldrich | P4394-100MG        |

**Table S3 Mass cytometry panel for co-culture experiments**

| <b>Antigen</b>         | <b>Clone</b> | <b>Metal label</b> | <b>Mass</b> | <b>Source</b>   | <b>Catalog No.</b> |
|------------------------|--------------|--------------------|-------------|-----------------|--------------------|
| CD7                    | CD7-6B7      | In                 | 113         | BioLegend       | 343102             |
| CD45                   | HI30         | In                 | 115         | BioLegend       | 304002             |
| CD11a                  | HI111        | La                 | 139         | BD Biosciences  | 14-0119-82         |
| CD96                   | 628211       | Nd                 | 142         | R&D Systems     | MAB6199-SP         |
| CD107a                 | H4A3         | Nd                 | 143         | BioLegend       | 328602             |
| CD94                   | DX22         | Nd                 | 144         | BioLegend       | 305502             |
| IFNg                   | B27          | Nd                 | 145         | BioLegend       | 506501             |
| CD8                    | RPA-T8       | Nd                 | 146         | Fluidigm        | 3146001B           |
| CD57                   | HCD57        | Sm                 | 147         | BioLegend       | 322302             |
| CRTAM                  | 210213       | Nd                 | 148         | R&D Systems     | MAB16951-SP        |
| DNAM1                  | TX25         | Sm                 | 149         | BioLegend       | 337102             |
| MIP1b                  | D21-1351     | Nd                 | 150         | Fluidigm        | 3150004B           |
| CD2                    | TS1/8        | Eu                 | 151         | Fluidigm        | 3151003B           |
| TNFa                   | MAB11        | Sm                 | 152         | Fluidigm        | 3152002B           |
| CD45RA                 | HI100        | Eu                 | 153         | Fluidigm        | 3153001B           |
| NKG2D                  | 1D11         | Sm                 | 154         | BioLegend       | 320802             |
| CRACC                  | 162.1        | Gd                 | 155         | BioLegend       | 331802             |
| 2B4                    | C1.7         | Gd                 | 156         | BioLegend       | 329502             |
| SAP                    | XLP 1D12     | Gd                 | 157         | Cell Signaling  | Custom             |
| LAIR-1                 | DX26         | Gd                 | 158         | BD Biosciences  | 550810             |
| CD161                  | 191B8        | Tb                 | 159         | Beckman         | Custom             |
| NKp30                  | 210845       | Gd                 | 160         | R&D Systems     | MAB1849-SP         |
| DAP12                  | 406288       | Dy                 | 161         | R&D Systems     | MAB5240-SP         |
| CD69                   | FN50         | Dy                 | 162         | Fluidigm        | 3162001B           |
| EAT2                   | Polyclonal   | Dy                 | 163         | Abcepta         | AF1351a            |
| GMCSF                  | BVD2-21C11   | Dy                 | 164         | BioLegend       | 502301             |
| CD16                   | 3G8          | Ho                 | 165         | Fluidigm        | 3165001B           |
| TIGIT                  | MBSA43       | Er                 | 166         | eBioscience     | 16-9500-82         |
| IL-3                   | BVD8-3G11    | Er                 | 167         | BioLegend       | 500502             |
| NTB                    | NT-7         | Er                 | 168         | BioLegend       | 317202             |
| LILRB1                 | HP-F1        | Tm                 | 169         | Beckman Coulter | Custom             |
| NKG2C                  | 134591       | Er                 | 170         | R&D Systems     | MAB138-100         |
| MIP1a                  | 93342        | Yb                 | 171         | R&D Systems     | MAB2701-SP         |
| NKp46                  | 195314       | Yb                 | 172         | R&D Systems     | MAB1850-100        |
| NKG2A                  | Z199         | Yb                 | 174         | Beckman         | IM2750             |
| KLRG1                  | 2F1          | Lu                 | 175         | eBioscience     | 562190             |
| CD56                   | NCAM16.2     | Yb                 | 176         | Fluidigm        | BDB559043          |
| DNA                    |              | Ir                 | 191/193     | Fluidigm        | 201192A            |
| Cisplatin<br>Viability |              | Pt                 | 195         | Sigma-Aldrich   | P4394-100MG        |

**Table S4 Mass cytometry panel for analysis of epithelial cells**

| <b>Antigen</b>         | <b>Clone</b> | <b>Metal label</b> | <b>Mass</b> | <b>Source</b>                  | <b>Catalog No.</b> |
|------------------------|--------------|--------------------|-------------|--------------------------------|--------------------|
| vimentin               | D21H3        | In                 | 113         | Cell Signaling<br>Technology   | Custom             |
| HLA-ABC                | W6/32        | La                 | 139         | BioLegend                      | 311427             |
| B7H6                   | 875001       | Pr                 | 141         | R&D Systems                    | MAB7144SP          |
| synCAM                 | 3E1          | Nd                 | 142         | MBL                            | CM004-3            |
| ULBP1                  | 170818       | Nd                 | 143         | R&D Systems                    | MAB1380-SP         |
| ULBP3                  | 166510       | Nd                 | 144         | R&D Systems                    | MAB1517-SP         |
| CD112<br>(Nectin-2)    | TX31         | Nd                 | 145         | BioLegend                      | 337402             |
| CD111<br>(Nectin-1)    | R1.302       | Nd                 | 146         | BioLegend                      | 340402             |
| B-catenin              | D10A8        | Sm                 | 147         | Fluidigm                       | 3147005A           |
| CD113<br>(Nectin-3)    | N3.12.4      | Sm                 | 149         | Santa Cruz<br>Biotechnology    | sc-69715           |
| PDL1<br>(CD274)        | E1L3N        | Nd                 | 150         | Cell Signaling<br>Technology   | Custom             |
| TCF1/7                 | C63D9        | Eu                 | 151         | Cell Signaling<br>Technology   | Custom             |
| pAkt (S473)            | D9E          | Sm                 | 152         | Cell Signaling<br>Technology   | Custom             |
| ADAM17                 | 111633       | Eu                 | 153         | R&D Systems                    | MAB9301-SP         |
| CD155                  | TX24         | Sm                 | 154         | BioLegend                      | 337502             |
| BAT3/BAG-6             | EPR9223      | Gd                 | 156         | Abcam                          | ab137076           |
| ULBP2/5/6              | 165903       | Gd                 | 157         | R&D Systems                    | MAB1298-SP         |
| E-cadherin<br>(CD324)  | 67A4         | Gd                 | 158         | BioLegend                      | 324102             |
| CBL-C                  | 10F4.2       | Tb                 | 159         | Millipore                      | MABS1173           |
| Nectin-4               | polyclonal   | Gd                 | 160         | R&D Systems                    | AF2659-SP          |
| pH2A.X<br>(S139)       | JBW301       | Dy                 | 161         | Sigma-Aldrich                  | 05-636             |
| pATM<br>(S1981)        | EP1890Y      | Dy                 | 162         | Abcam                          | ab81292            |
| hPDL2<br>(CD273)       | 24F.10C12    | Dy                 | 163         | BioLegend                      | 329623             |
| ACE2                   | polyclonal   | Ho                 | 165         | R&D Systems                    | AF933-SP           |
| ULBP4                  | 709116       | Er                 | 166         | R&D Systems                    | MAB6285-SP         |
| HNF1B                  | polyclonal   | Er                 | 167         | Proteintech                    | 12533-1-AP         |
| HLA-E                  | MEM-E/02     | Er                 | 168         | Bio-Rad                        | MCA2193            |
| N-Protein              | 36           | Yb                 | 172         | Gift from Dr. An-<br>Suei Yang |                    |
| MICA                   | 159227       | Bi                 | 209         | R&D Systems                    | MAB1300-SP         |
| DNA                    |              | Ir                 | 191/193     | Fluidigm                       | 201192A            |
| Cisplatin<br>Viability |              | Pt                 | 195         | Sigma-Aldrich                  | P4394-100MG        |
